# Supplementary material for: Sleep Variability, Eating Timing Variability, and Carotid Intima‐Media Thickness in Early Adulthood
Source: PubMed Central journal article supplement — J Am Heart Assoc. 2023 Sep 30;12(19):e029662. doi: 10.1161/JAHA.123.029662 (PMC10727236; doi:10.1161/jaha.123.029662), 2023-09-30
Supplement: JAH3-12-e029662-s001.pdf [file JAH3-12-e029662-s001.pdf]

# **SUPPLEMENTAL MATERIAL**

**Table S1. Bivariate correlations between demographic, lifestyle, and biological factors with CIMT.**

|                                                                                             | CIMT, mm                    |             |
|---------------------------------------------------------------------------------------------|-----------------------------|-------------|
|                                                                                             | <i>r</i> or <i>F</i> -value | <i>p</i>    |
| <b>Racial/Ethnic Minority</b> , yes/no                                                      | -0.01                       | 0.94        |
| <b>Highest Education Level</b> , high school/college (undergraduate/4-year)/graduate school | 0.37                        | 0.69        |
| <b>BMI</b> , kg/m <sup>2</sup>                                                              | 0.06                        | 0.65        |
| <b>MVPA</b> , minutes/day                                                                   | 0.09                        | 0.48        |
| <b>Sleep Onset</b> , clock time                                                             | -0.04                       | 0.78        |
| <b>Sleep Efficiency</b> , %                                                                 | -0.13                       | 0.33        |
| <b>WASO</b> , minutes                                                                       | 0.12                        | 0.37        |
| <b>Total Energy Intake</b> , kcal/day                                                       | -0.28                       | <b>0.03</b> |
| <b>Diet Quality</b> , HEI score                                                             | -0.05                       | 0.70        |
| <b>Eating Onset</b> , clock time                                                            | 0.09                        | 0.50        |
| <b>Eating Offset</b> , clock time                                                           | -0.09                       | 0.50        |
| <b>Caloric Midpoint</b> , clock time                                                        | 0.13                        | 0.34        |

Pearson's correlations (continuous independent variable), point biserial correlations (dichotomous independent variable), and ANOVAs (categorical independent variable with >2 categories) were used to evaluate associations with CIMT, as appropriate. Bolded *p*-values meet pre-determined threshold for inclusion in multivariable regression models ( $p < 0.10$ ). BMI, body mass index; MVPA, moderate-vigorous physical activity; WASO, wake after sleep onset.

**Table S2. Median (IQR) and skewness for all continuous study variables (n=62).**

|                                                | <b>Median (IQR)</b> | <b>Skewness</b> |
|------------------------------------------------|---------------------|-----------------|
| <b><i>General Characteristics</i></b>          |                     |                 |
| <b>Age, years</b>                              | 26.8 (23.0-25.3)    | 0.6             |
| <b>Insomnia Severity Index, score</b>          | 3.0 (2.0-4.0)       | 1.6             |
| <b>BMI, kg/m<sup>2</sup></b>                   | 24.0 (23.0-25.3)    | 0.4             |
| <b>Systolic Blood Pressure, mmHg</b>           | 113 (107-120)       | 0.2             |
| <b>Diastolic Blood Pressure, mmHg</b>          | 68 (66-75)          | 0.2             |
| <b>CIMT, mm</b>                                | 0.53 (0.51-0.59)    | 0.3             |
| <b>MVPA, minutes/day</b>                       | 50.5 (38.6-68.8)    | 1.5             |
| <b><i>Actigraphy-Derived Sleep Metrics</i></b> |                     |                 |
| <b>Sleep Onset, clock hour</b>                 | 23:33 (22:44-00:14) | 0.1             |
| <b>Sleep Duration, minutes/night</b>           | 453.8 (426.1-471.8) | 0.0             |
| <b>Sleep Efficiency, %</b>                     | 92.3 (91.1-94.0)    | -0.6            |
| <b>WASO, minutes</b>                           | 33.8 (27.3-40.8)    | 0.8             |
| <b>Sleep Onset SD, minutes</b>                 | 52.1 (36.6-70.0)    | 0.7             |
| <b>Sleep Duration SD, minutes</b>              | 59.4 (46.0-84.8)    | 0.9             |
| <b><i>Eating Metrics</i></b>                   |                     |                 |
| <b>Total Energy Intake, kcal/day</b>           | 2183 (1906-2479)    | 3.0             |
| <b>Diet Quality, HEI score<sup>†</sup></b>     | 67.5 (57.6-76.6)    | -0.4            |
| <b>Eating Onset, clock hour</b>                | 08:37 (08:00-09:15) | 0.5             |
| <b>Eating Offset, clock hour</b>               | 20:14 (19:35-21:22) | 0.2             |
| <b>Caloric Midpoint, clock hour</b>            | 15:17 (14:12-16:01) | 0.1             |
| <b>Eating Onset SD, minutes</b>                | 67.5 (50.0-96.2)    | 1.0             |
| <b>Eating Offset SD, minutes</b>               | 77.5 (62.0-101.8)   | 1.0             |
| <b>Caloric Midpoint SD, minutes</b>            | 154.5 (128.0-173.0) | 0.0             |

IQR is presented as 1<sup>st</sup>-3<sup>rd</sup> quartile. Values  $\pm 2$  or greater indicate non-negligible skewness. HEI, Healthy Eating Index; IQR, interquartile ratio; SD, standard deviation; WASO, wake after sleep onset.

**Figure S1. The study protocol consisted of a remote ‘pre-screen’ followed by in-person informed consent and screening (visit 1).**

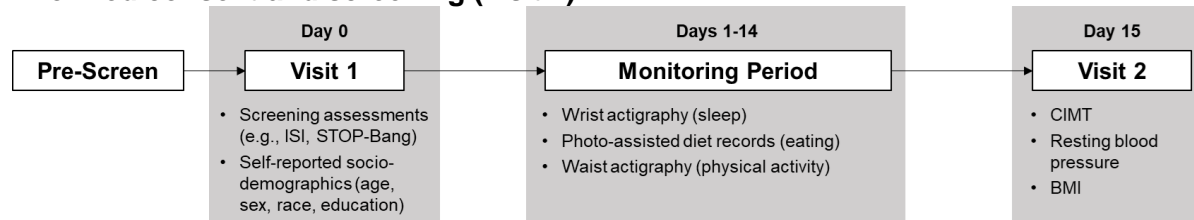

Eligible participants who provided written consent underwent a 14-day period where behaviors of sleep, eating, and physical activity were continuously monitored, immediately followed by CIMT, resting blood pressure, and BMI assessments (visit 2). See manuscript text for additional details on all study measures. Note that time elapsed between visit 1 and the 14-day monitoring period varied according to participant availability and scheduling. BMI, body mass index; CIMT, carotid intima-media thickness; ISI, Insomnia Severity Index; STOP-Bang, STOP-Bang Sleep Apnea Questionnaire.

**Figure S2. Flow diagram of study participants according to stage of enrollment.**

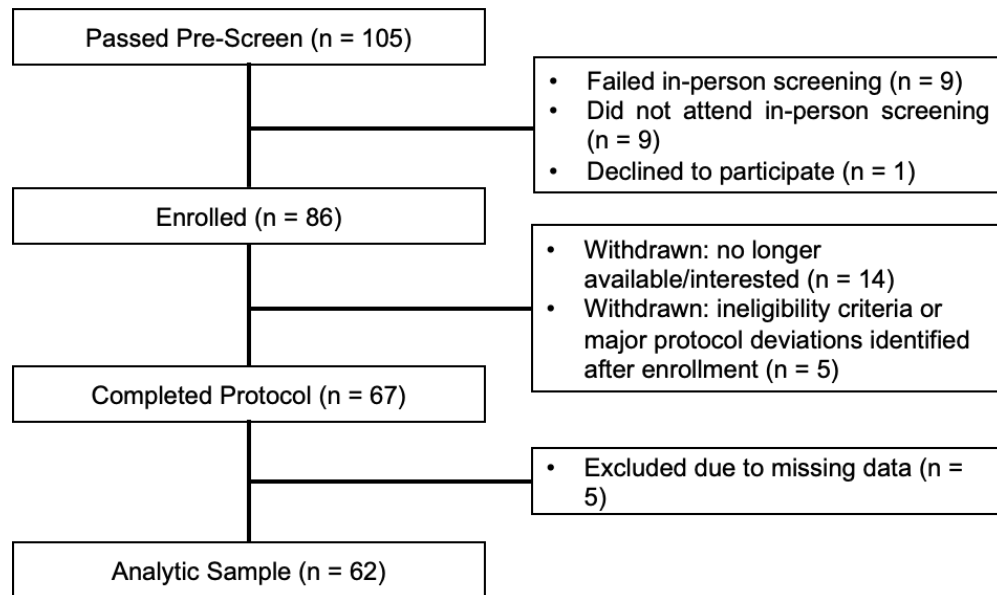

Participant enrollment occurred between April 2021 – December 2022. Participants who completed the protocol were excluded from this analysis for missing CIMT data (n=3) and dietary data (n=2). CIMT, carotid intima media thickness.
